# Supplementary material
Source: Springer Nature journal article supplement (https://www.springermedizin.de/resource/supplementary/12913_2013_3740_MOESM9_ESM.pdf/9532248)

Q: Severe poisoning - what dose of oximes would you prescribe?

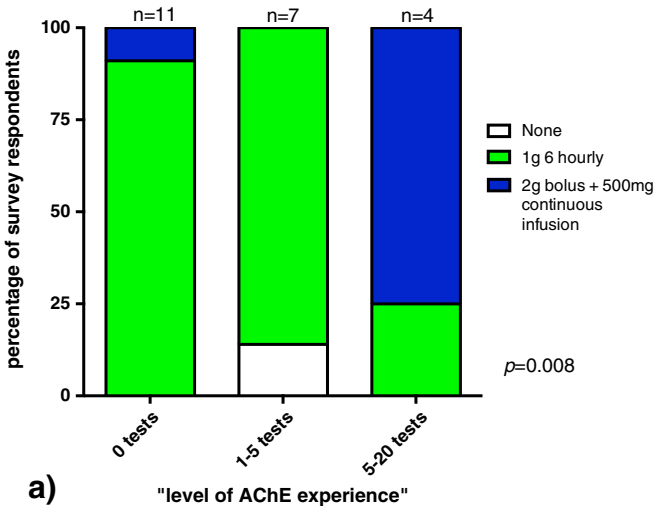

Q: Severe poisoning - what duration would you prescribe oximes for?

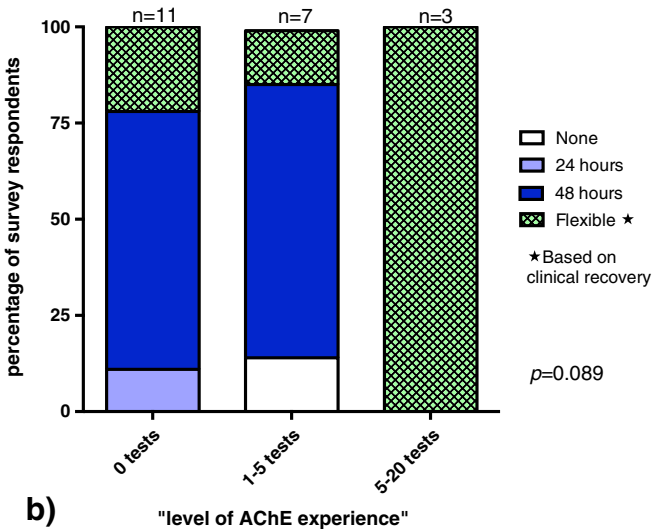

Supplement: MOESM9 [file 9532248]
